# Supplementary material for: Flexible corner cube retroreflector array for temperature and strain sensing
Source: Royal Society of Chemistry journal article supplement (doi:10.1039/c7ra13284k), 2018-01-01
Supplement: c7ra13284k1.pdf [file c7ra13284k1.pdf]

## Supplementary Information

# Flexible Corner Cube Retroreflector Array for Temperature and Strain Sensing

*Muhammad Waqas Khalid,<sup>1</sup> Rajib Ahmed,<sup>1</sup> Ali K. Yetisen,<sup>2</sup> and Haider Butt<sup>1,\*</sup>*

<sup>1</sup>Nanotechnology Laboratory, School of Engineering, University of Birmingham, Birmingham  
B15 2TT, UK.

<sup>2</sup>Harvard-MIT Division of Health Sciences and Technology, Harvard University and  
Massachusetts Institute of Technology, Cambridge, MA, 02139, USA.

\*E-mail: h.butt@bham.ac.uk, Tel.: +441214158623

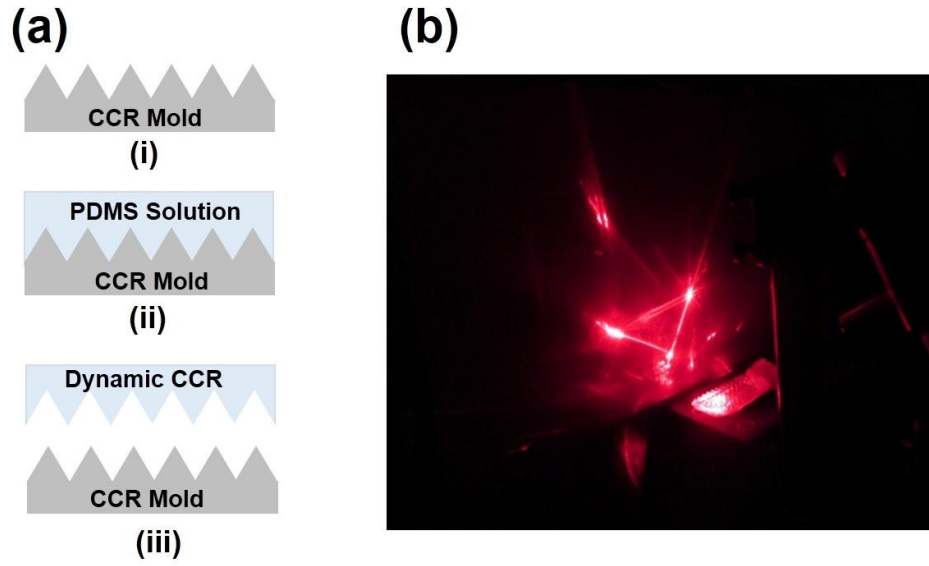

**Figure S1:** (a) Dynamic CCR fabrication (b) optical characterization through reflection mode.

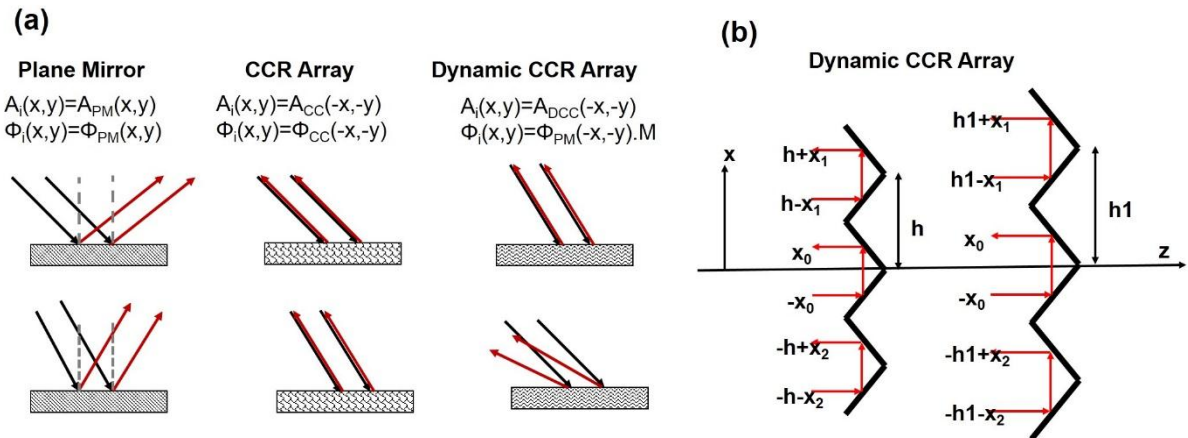

**Figure S2:** (a-b) Reflection and retroreflection property of plane mirror, CCR array, and dynamic CCR array.

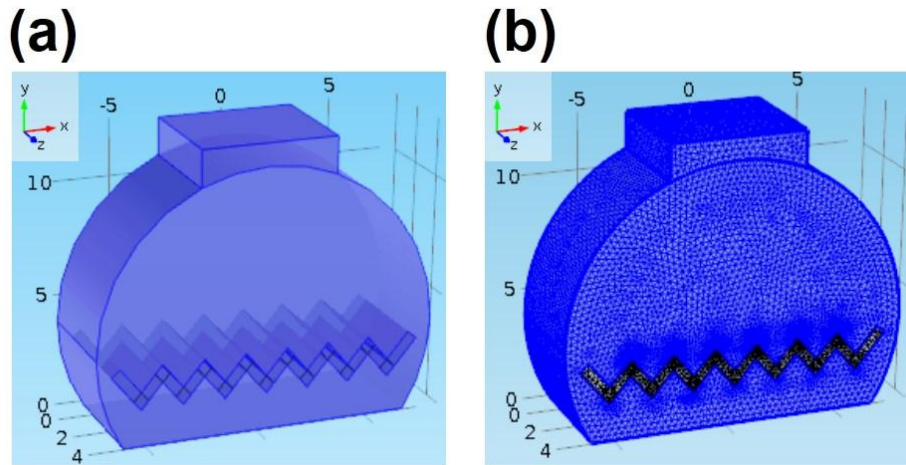

**Figure S3:** (a-b) 3D simulation and mesh diagram.

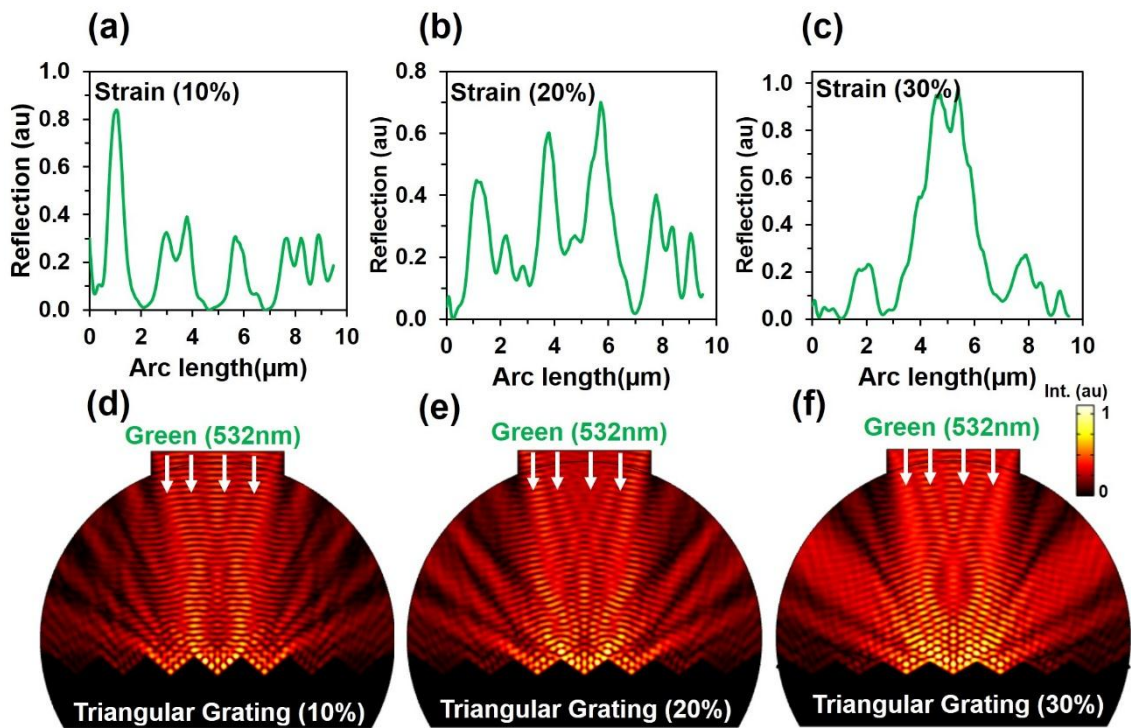

**Figure S4:** Computation modeling of retroreflection, diffraction/scattering from triangular grating structure with strain variation (10, 20, 30%) and green light illumination.

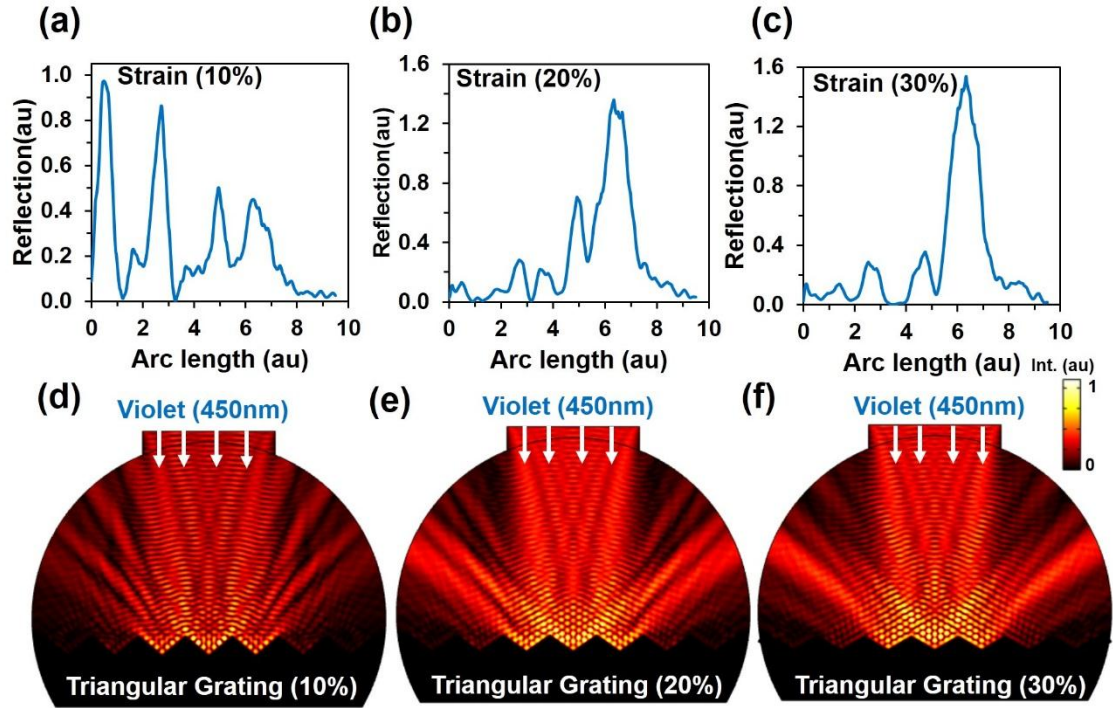

**Figure S5:** Computation modeling of retroreflection, diffraction/scattering from triangular grating structure with strain variation (10, 20, 30%) and violet light normal illumination.

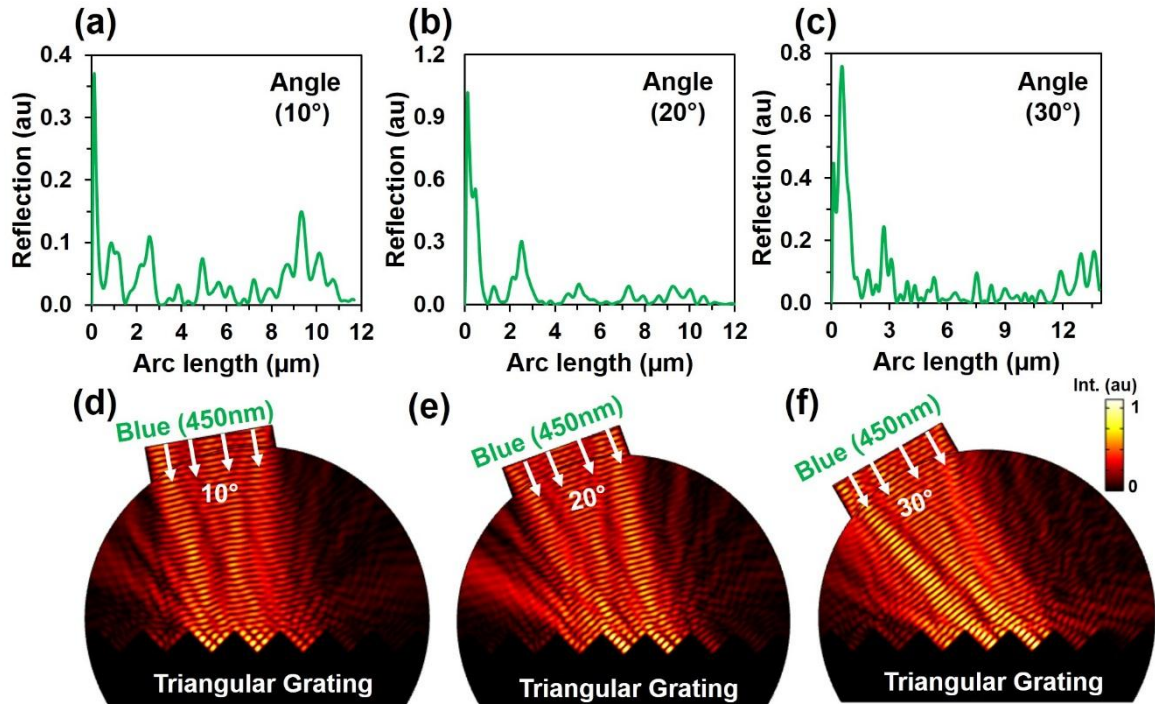

**Figure S6:** Computation modeling of retroreflection, diffraction/scattering from triangular grating structure with green light illumination angle variation.

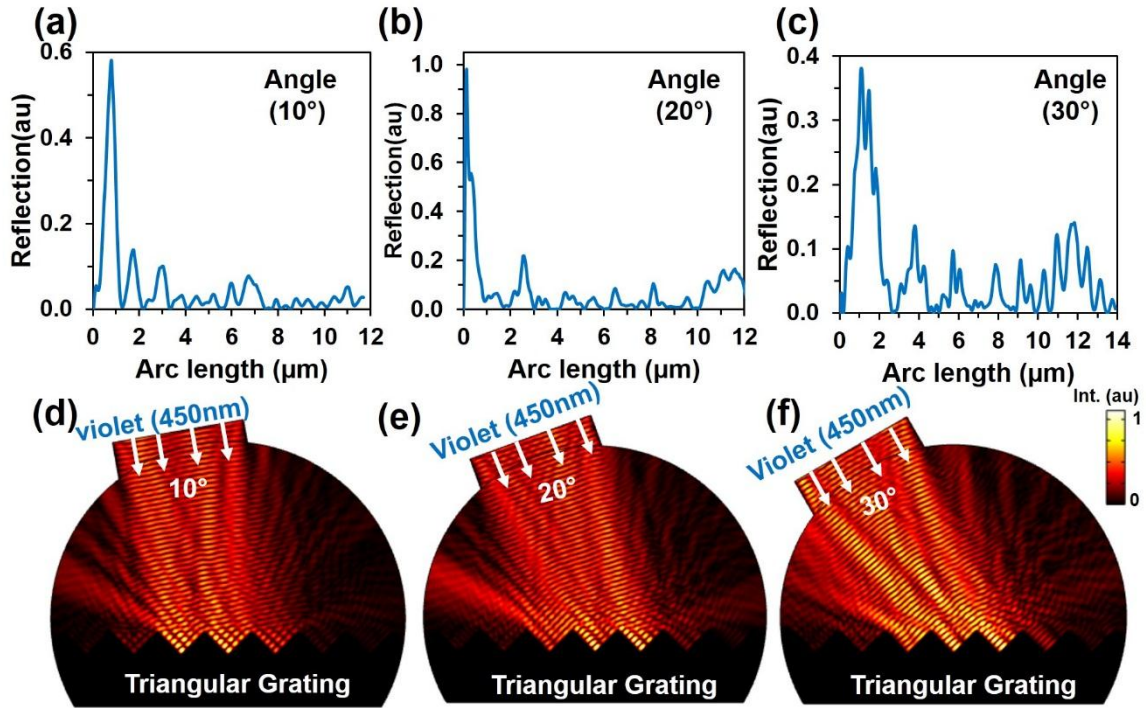

**Figure S7:** Computation modeling of retroreflection, diffraction/scattering from triangular grating structure with violet light illumination angle variation.

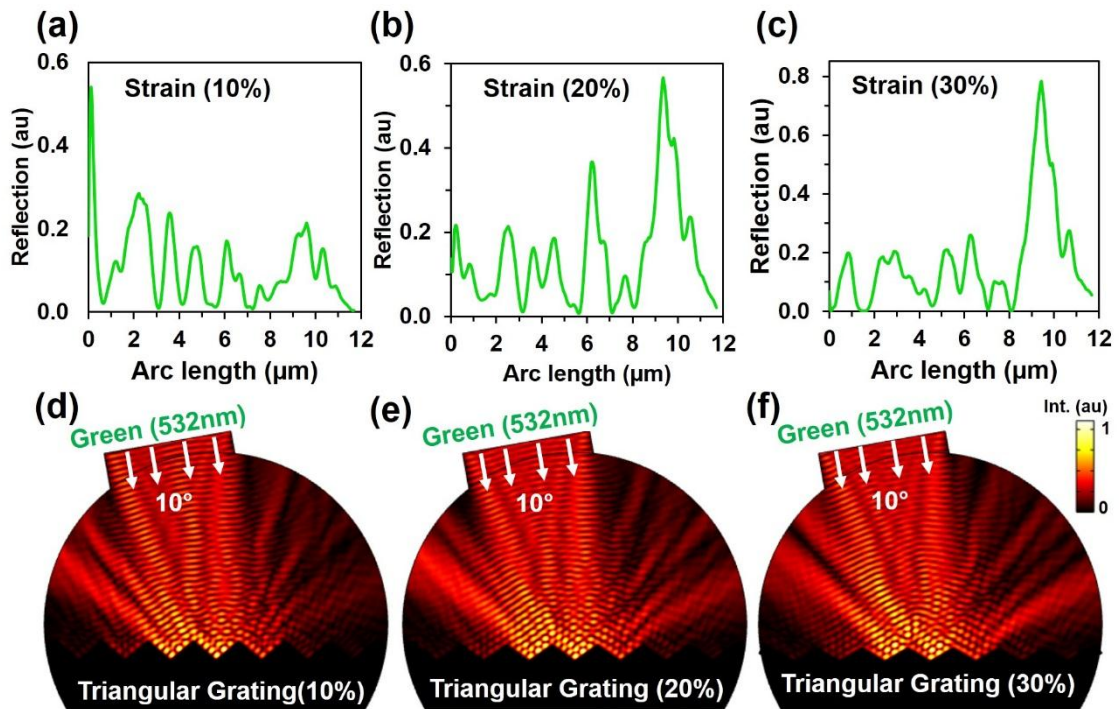

**Figure S8:** Computation modeling of retroreflection, diffraction/scattering from triangular grating structure with strain variation (10, 20, 30%) and green light 10° illumination.

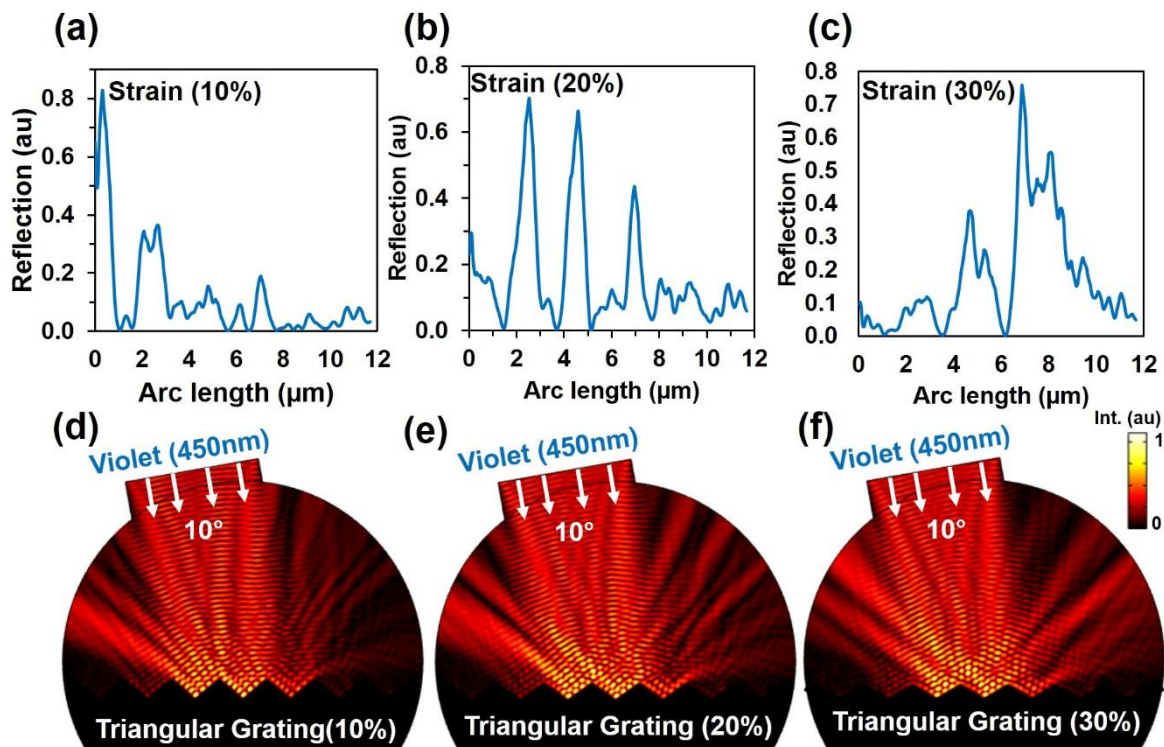

**Figure S9:** Computation modeling of retroreflection, diffraction/scattering from triangular grating structure with strain variation (10, 20, 30%) and blue light  $10^\circ$  illumination.

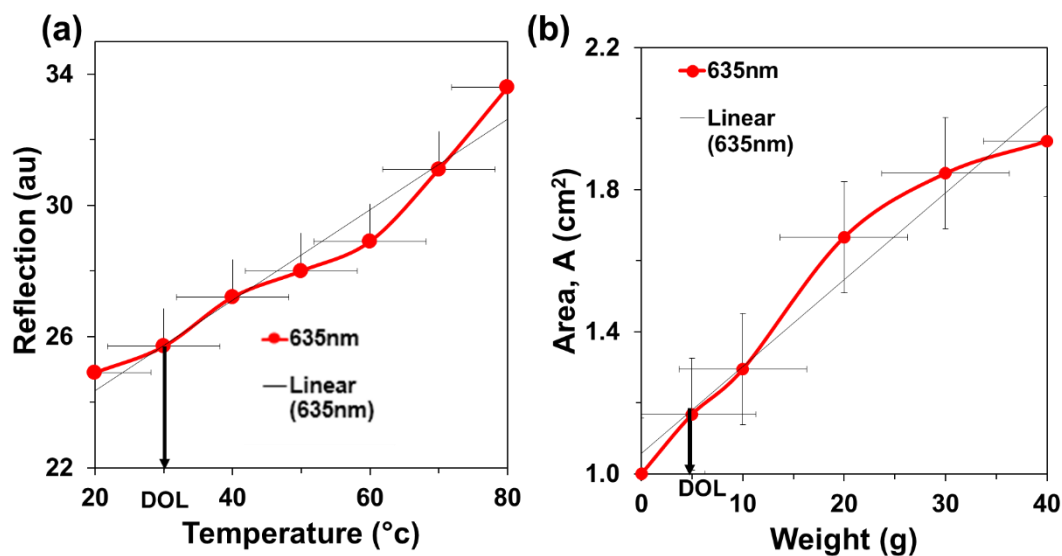

**Figure S10:** The detection limit (DOL) calculation for (a) temperature and (b) weight variation during red (635 nm) illumination.
